# Supplementary material for: Prognostic Significance of Different Ventricular Ectopic Burdens During Submaximal Exercise in Asymptomatic UK Biobank Subjects
Source: PubMed Central journal article supplement (PMC10712993; doi:10.1161/circulationaha.123.064633), 2023-10-19
Supplement: cir-148-1932-s001.pdf [file cir-148-1932-s001.pdf]

Figure S1 ECG QRS detection & classification

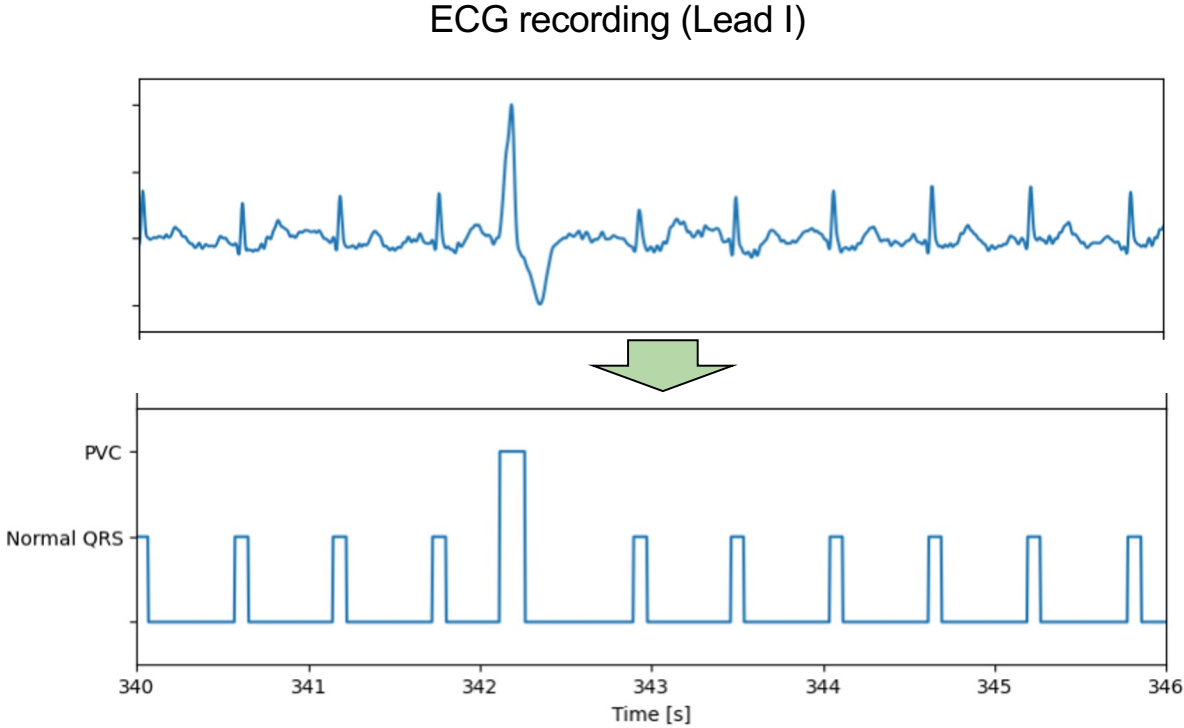

**Figure S2 Distributions of PVC Counts**

**Exercise**

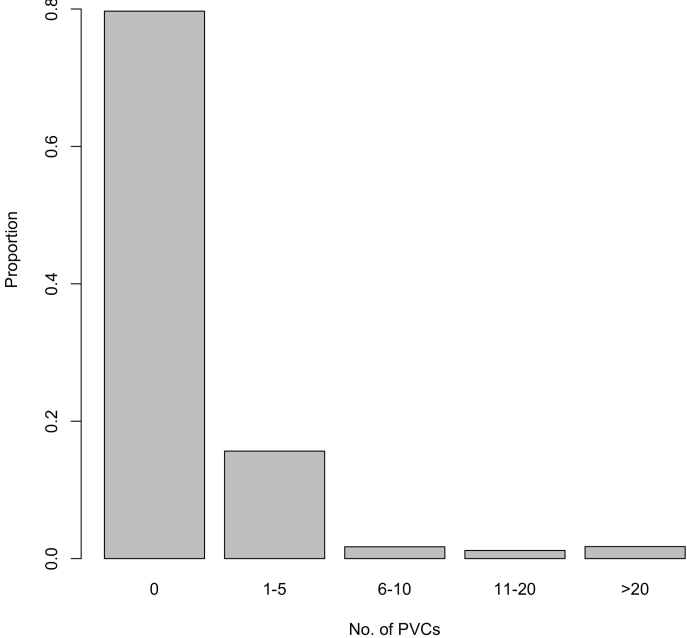

**Recovery**

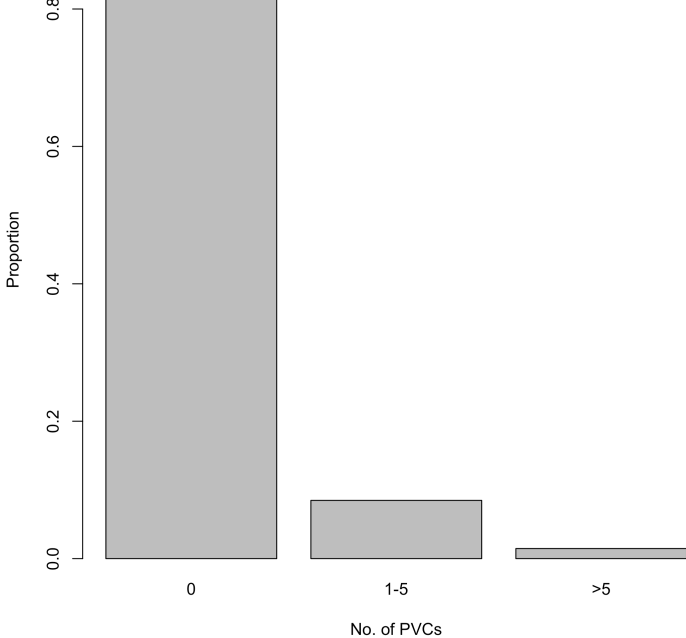

**Figure S3: Adjusted Hazard Ratios of MI/HF/LTVA Events According to Presence of Different PVC Patterns**

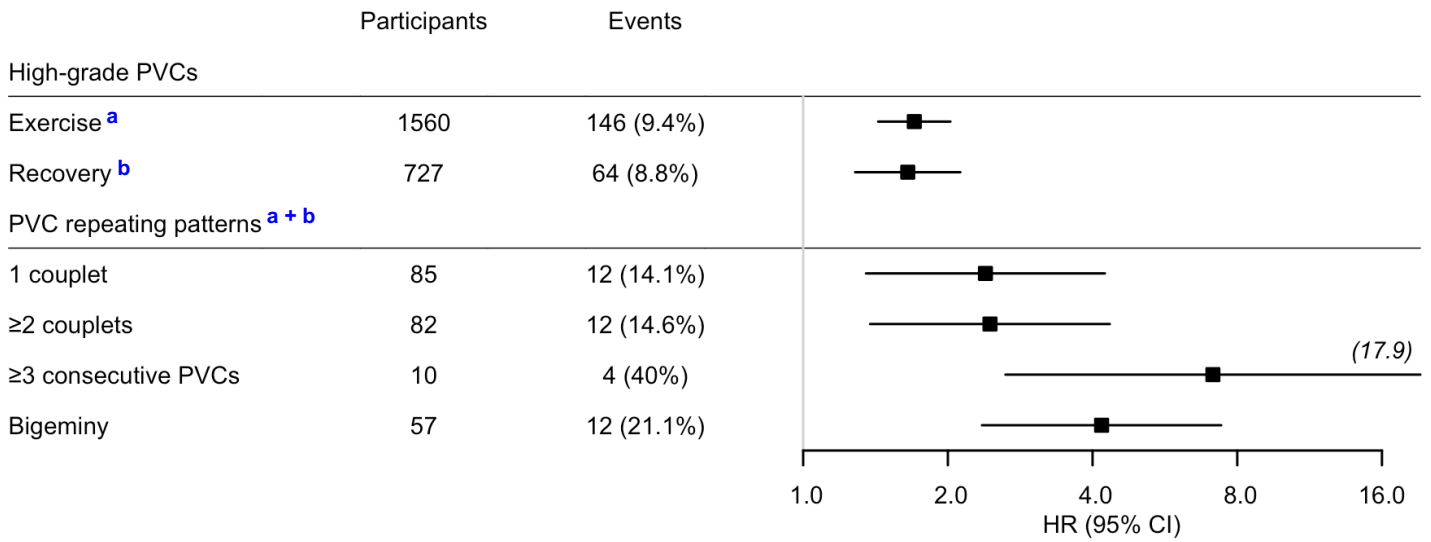

Hazard ratios were adjusted for clinical and exercise test variables and were all statistically significant ( $P < 0.05$ ). Clinical variables: age, sex, diabetes, hypertension, beta-blocker medication, LDL and HDL cholesterol, triglycerides, body mass index, QRS duration, QTc interval, ST depression ( $>0.1$  mV), and exercise ECG variables: <sup>a</sup>Total number of beats during exercise, and heart rate exercise; <sup>b</sup>Total number of beats during recovery, and heart rate recovery. HRs were referenced against participants without PVCs during exercise (*a*), recovery (*b*), or both (*a + b*). PVC: premature ventricular complex. HR hazard ratio, CI confidence interval.
